# Supplementary material for: Ocean Phosphorus Inventory and Ocean Deoxygenation:Large Uncertainties in Future Projections on MillennialTimescales
Source: Copernicus journal article supplement (doi:10.5194/esd-2018-58), 2018-10-02
Supplement: Supplementary file 1 [file esd-2018-58-supplement.pdf]

Supplement:

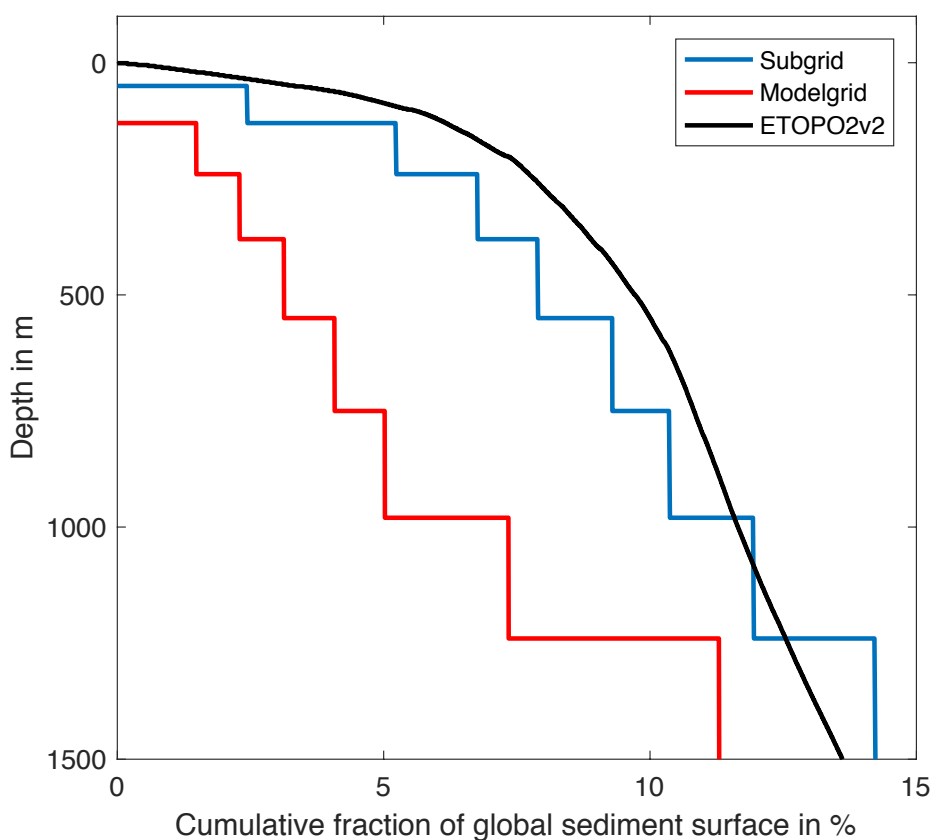

Fig. S1: Hypsometry for the upper ocean for the model bathymetry (blue and red lines) versus observations (black line) from ETOPO2v2 (National Geophysical Data Center, 2006).

5

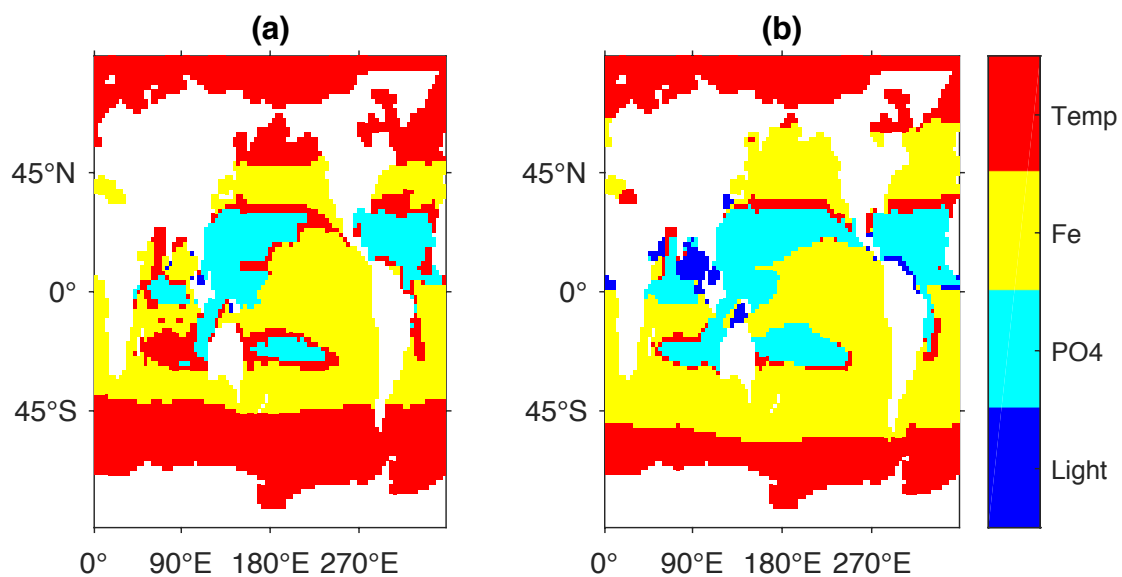

Fig. S2: Spatial distribution of the most limiting factors for growth of diazotrophs for (a) the preindustrial case and (b) simulation year 5000 for *Weath0.15*. Limitation of iron (Fe) and phosphate (PO<sub>4</sub>) are based on Monod kinetics so that the limitation factors vary between 0 and 1. The light limitation factor also varies

10

between 0 and 1. In the model, diazotrophs only grow at temperatures higher than 15.7 °C. For temperatures above 15.7 °C, diazotroph growth depends on the equation  $\exp(T/15.7^\circ\text{C})-2.61$ . Diazotroph growth is not limited by nitrate availability in the model. A more detailed description of diazotroph growth and iron limitation can be found in Keller et al. (2012) and Nickelsen et al. (2015).

15

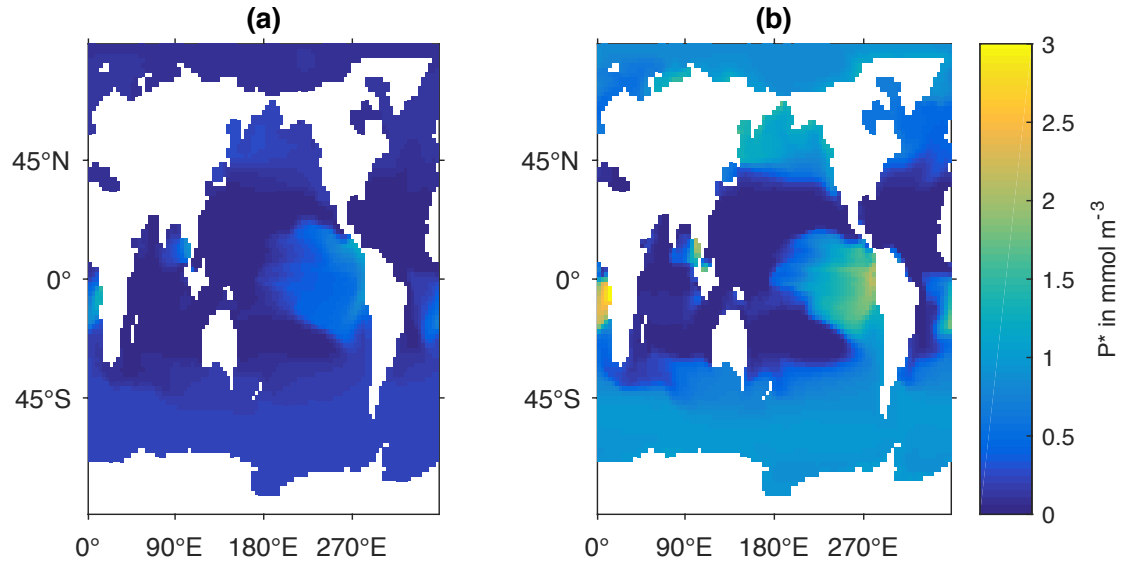

Fig. S3: Spatial distribution of  $P^*=P-N/16$  (dissolved P, N) in the surface ocean for (a) the preindustrial case and (b) simulation year 5000 for *Weath0.15*.

20
